# Supplementary material for: Tree Root-Associated Microbial Communities Depend on Various Floor Management Systems in an Intensive Apple (Malus × domestica Borkh.) Orchard
Source: MDPI journal article supplement (doi:10.3390/ijms24129898), 2023-06-08
Supplement: s1 [file s1]

## Supplementary Material

Table S1. The specific sequences of the 341F and 785R primers with adaptors. The primers contain Illumina adaptor sequence (in italics) and V3-V4 16S rRNA locus specific sequence.

| Primer | Sequence                                                           |
|--------|--------------------------------------------------------------------|
| 341F   | 5' <i>TCGTCGGCAGCGTCAGATGTGTATAAGAGACAG</i> CCTACGGGNGGCWGCAG      |
| 785R   | 5' <i>GTCTCGTGGGCTCGGAGATGTGTATAAGAGACAG</i> GACTACHVGGGTATCTAATCC |

Table S2. PCR conditions for analysis of bacterial and fungal population.

| Steps                | Temperature (°C) | Duration   | Cycles |
|----------------------|------------------|------------|--------|
| Initial denaturation | 98               | 30 seconds | 1      |
| Denaturation         | 98               | 10 seconds | 25     |
| Annealing            | 55               | 30 seconds |        |
| Extension            | 72               | 20 seconds |        |
| Final denaturation   | 72               | 2 minutes  | 1      |

Table S3. PCR conditions for amplicon indexing.

| Steps                | Temperature (°C) | Duration   | Cycles |
|----------------------|------------------|------------|--------|
| Initial denaturation | 98               | 30 seconds | 1      |
| Denaturation         | 98               | 10 seconds | 7      |
| Annealing            | 65               | 30 seconds |        |
| Extension            | 72               | 20 seconds |        |
| Final denaturation   | 72               | 2 minutes  | 1      |

Table S4. The specific sequences of the ITS1FI2 and 8S primers with adaptors. The primers contain Illumina adaptor sequence (in italics) and ITS1 locus specific sequence.

| Primer  | Sequence                                                       |
|---------|----------------------------------------------------------------|
| ITS1FI2 | 5' <i>TCGTCGGCAGCGTCAGATGTGTATAAGAGACAG</i> GAACCGCGGARGGATCA  |
| 5.8S    | 5' <i>GTCTCGTGGGCTCGGAGATGTGTATAAGAGACAG</i> CGCTGCGTTCTTCATCG |
